# Supplementary material for: Co-Overexpression of TWIST1-CSF1 Is a Common Event in Metastatic Oral Cancer and Drives Biologically Aggressive Phenotype
Source: MDPI journal article supplement (doi:10.3390/cancers13010153), 2021-01-05
Supplement: s1 [file s1]

# Co-Overexpression of TWIST1-CSF1 is a Common Event in Metastatic Oral Cancer and Drives Biologically Aggressive Phenotype

Sabrina Daniela da Silva, Fabio Albuquerque Marchi, Jie Su, Long Yang, Ludmila Valverde, Jessica Hier, Krikor Bijian, Michael Hier, Alex Mlynarek, Luiz Paulo Kowalski and Moulay A. Alaoui-Jamali

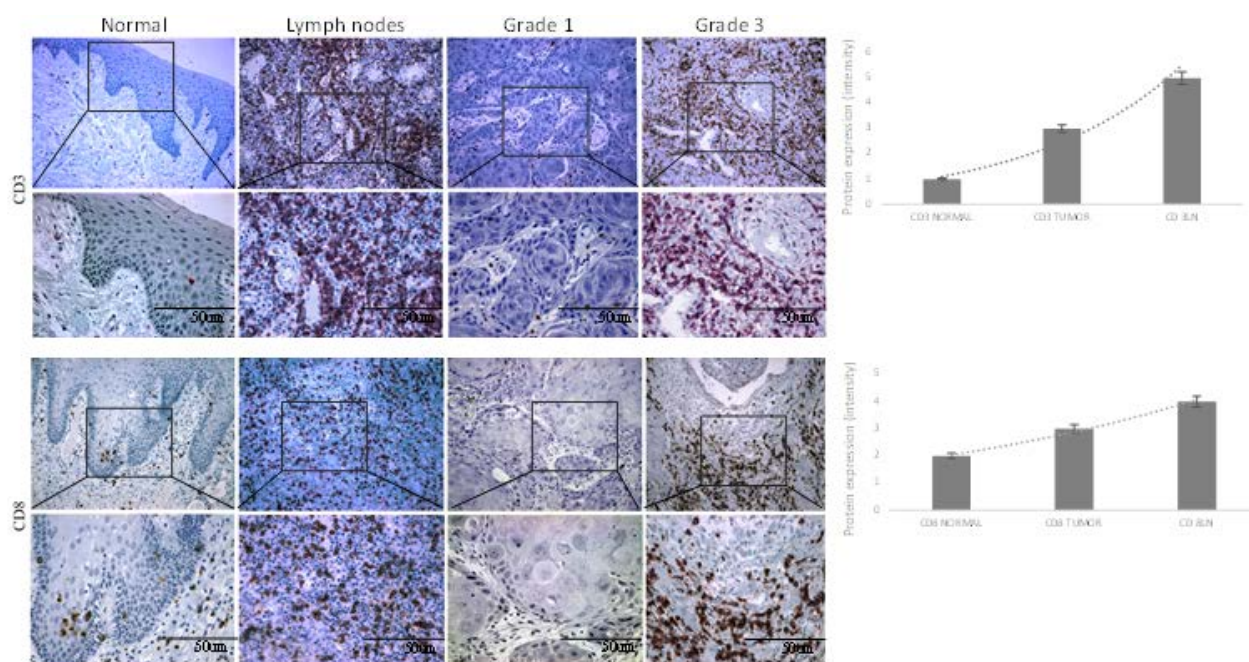

**Figure S1.** CD3 and CD8 infiltration in tissue samples from patients with OSCC. Immunohistochemistry images for CD3 (A) and CD8 (B) proteins in morphologically normal epithelial (left side), lymph nodes, and oral cancer at grade 1 and grade 3 samples (right side). A weak staining was observed in morphologically normal epithelial cells while a strong intensity of nuclear immunostaining was detected in oral cancer samples, specially the oral cancer grade 3 tumors and lymph nodes. Graphs (left) represent the CD3 and CD8 immunohistochemistry level (intensity) in normal, tumor and lymph nodes. Original magnification: 20× (top) and 200× (bottom).

Western blot analysis showing protein levels of CSF1 and Twist in various cell lines. The blots are labeled with the protein name and its molecular weight (MW).

**CSF1 (36.8 KDa)**

Cell lines (from left to right):

- AT84 Control
- AT84 CRISPR
- AT84 Reconstituted
- AT84 Control
- AT84 CRISPR
- AT84 Reconstituted

**Twist (21 KDa)**

Cell lines (from left to right):

- AT84 Control
- AT84 CRISPR
- AT84 Reconstituted
- AT84 Control
- AT84 CRISPR
- AT84 Reconstituted

05/05/19

GAPDH 37 KDa

↓ ↓ ↓ ↓ ↓

Vero A549 R6 H9 C636

R6 C636

GAPDH 37 KDa

CTL Crip1 R63 Reconstitute

↓ ↓ ↓

CTL Crip1 Reconstitute

GAPDH 37 KDa

RTG3 RTG3  
CTL CTL

RTG3  
Reconstitute

RTG4 RTG4  
CTL CTL

RTG4  
Reconstitute

GAPDH 37KDa

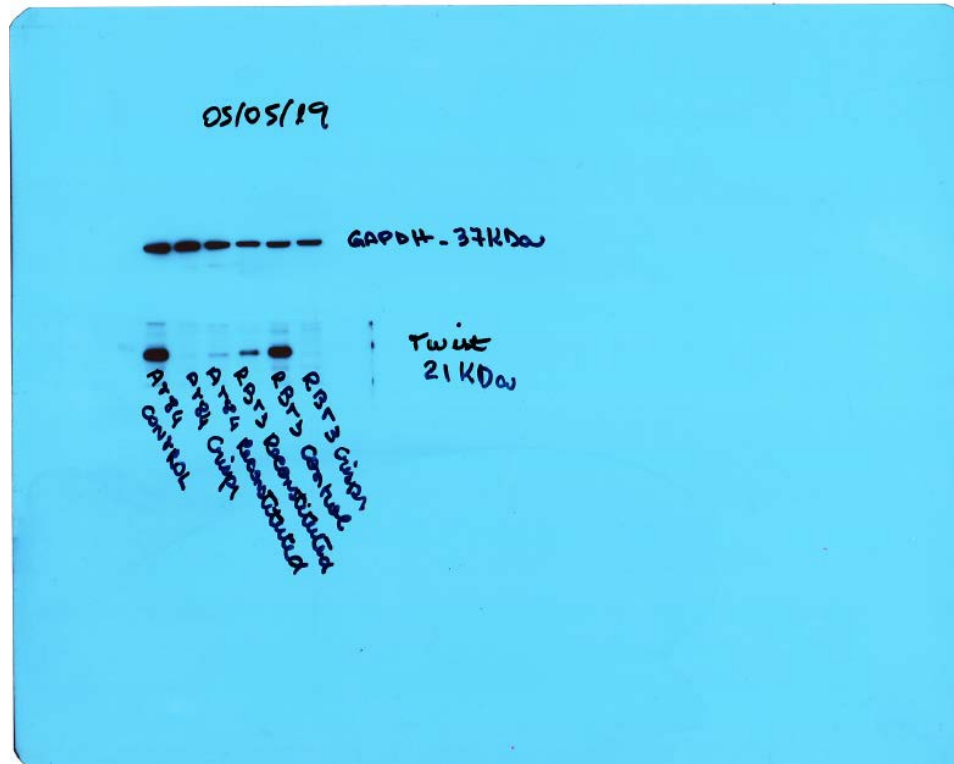

**Figure S2.** Detailed information about the western blot.

**Table S1.** Distribution of the OSCC cases according to demographic, lifestyle, and clinical variables.

| Variable                 | Category | Fresh Samples <i>n</i> (%)* |            | Paraffin-Embedded Samples <i>n</i> (%)* |            |
|--------------------------|----------|-----------------------------|------------|-----------------------------------------|------------|
|                          |          | Non-Metastatic              | Metastatic | Non-Metastatic                          | Metastatic |
| Age                      | <55 year | 5 (50)                      | 2 (20)     | 39 (54.2)                               | 15 (53.6)  |
|                          | ≥55 year | 5 (50)                      | 8 (80)     | 33 (45.8)                               | 13 (46.4)  |
| Gender                   | Male     | 7 (70)                      | 10 (100)   | 56 (77.8)                               | 25 (89.3)  |
|                          | Female   | 3 (30)                      | 0          | 16 (22.2)                               | 3 (10.7)   |
| Smoking habit            | No       | 4 (40)                      | 2 (20)     | 7 (10.8)                                | 1 (5)      |
|                          | Yes      | 6 (60)                      | 8 (80)     | 58 (89.2)                               | 19 (95)    |
| Alcohol consumption      | No       | 3 (30)                      | 1 (10)     | 16 (24.6)                               | 2 (10)     |
|                          | Yes      | 7 (70)                      | 9 (90)     | 49 (75.4)                               | 18 (90)    |
| T stage                  | T1 + T2  | 9 (90)                      | 4 (40)     | 28 (39.4)                               | 5 (22.7)   |
|                          | T3 + T4  | 1 (10)                      | 6 (60)     | 43 (60.6)                               | 17 (77.3)  |
| Nodal status             | N0       | 9 (90)                      | 3 (30)     | 45 (63.4)                               | 1 (4.3)    |
|                          | N+       | 1 (10)                      | 7 (70)     | 26 (36.6)                               | 22 (95.7)  |
| Tumor grade              | I        | 4 (40)                      | 0          | 25 (37.3)                               | 14 (24.1)  |
|                          | II       | 6 (60)                      | 0          | 29 (43.3)                               | 28 (48.3)  |
|                          | III      | 0                           | 10 (100)   | 13 (19.4)                               | 16 (27.6)  |
| Recurrence or metastasis | No       | 10 (100)                    | 0          | 72 (100)                                | 0          |
|                          | Yes      | 0                           | 10 (100)   | 0                                       | 28 (100)   |
| Death                    | No       | 10 (100)                    | 6 (60)     | 43 (59.7)                               | 6 (21.4)   |
|                          | Yes      | 0                           | 4 (40)     | 29 (40.3)                               | 22 (78.6)  |

\* Percentages considering cases with complete information.

**Table S2.** Association between CSF1 and clinicopathological characteristics.

| Variable            | Category  | CSF1             |                  |                | TWIST1           |                  |                |
|---------------------|-----------|------------------|------------------|----------------|------------------|------------------|----------------|
|                     |           | Negative         | Positive         | <i>P</i> Value | Negative         | Positive         | <i>P</i> Value |
| Age (median)        | < 66 year | 20 (51.3)        | 9 (69.2)         | 0.259          | 14 (42.4)        | 12 (52.2)        | 0.472          |
|                     | ≥ 66 year | 19 (48.7)        | 4 (30.8)         |                | 19 (57.6)        | 11 (47.8)        |                |
| Gender              | Male      | 24 (61.5)        | 7 (53.8)         | 0.624          | 23 (69.7)        | 15 (65.2)        | 0.724          |
|                     | Female    | 15 (38.5)        | 6 (46.2)         |                | 10 (30.3)        | 8 (34.8)         |                |
| Smoking habit       | No        | 18 (46.2)        | 5 (38.5)         | 0.629          | 2 (6.9)          | 3 (13.6)         | 0.423          |
|                     | Yes       | 21 (53.8)        | 8 (61.5)         |                | 27 (93.1)        | 19 (86.4)        |                |
| Alcohol consumption | No        | 12 (30.8)        | 3 (23.1)         | 0.596          | 7 (24.1)         | 6 (27.3)         | 0.799          |
|                     | Yes       | 27 (69.2)        | 10 (76.4)        |                | 22 (75.9)        | 16 (72.7)        |                |
| T stage             | T1+T2     | <b>27 (69.2)</b> | <b>5 (38.5)</b>  | <b>0.048</b>   | 15 (46.9)        | 10 (43.5)        | 0.082          |
|                     | T3+T4     | <b>12 (30.8)</b> | <b>8 (61.5)</b>  |                | 17 (53.1)        | 13 (56.5)        |                |
| Lymph nodes         | N0        | 32 (82.1)        | 8 (61.5)         | 0.128          | <b>31 (96.9)</b> | <b>7 (30.4)</b>  | <b>0.005</b>   |
|                     | N+        | 7 (17.9)         | 5 (38.5)         |                | <b>1 (3.1)</b>   | <b>16 (69.6)</b> |                |
| Tumor recurrence    | No        | 31 (79.5)        | 9 (69.2)         | 0.342          | <b>31 (93.9)</b> | <b>14 (60.9)</b> | <b>0.002</b>   |
|                     | Yes       | 7 (17.9)         | 5 (38.5)         |                | <b>2 (6.1)</b>   | <b>9 (41.1)</b>  |                |
| Status              | Alive     | <b>35 (89.7)</b> | <b>3 (23.1)</b>  | <b>0.021</b>   | <b>26 (78.8)</b> | <b>7 (30.4)</b>  | <b>0.003</b>   |
|                     | Died      | <b>4 (10.3)</b>  | <b>10 (76.9)</b> |                | <b>7 (21.2)</b>  | <b>16 (69.6)</b> |                |

\* Percentages considering cases with complete information.

**Publisher's Note:** MDPI stays neutral with regard to jurisdictional claims in published maps and institutional affiliations.

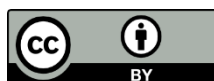

© 2021 by the authors. Licensee MDPI, Basel, Switzerland. This article is an open access article distributed under the terms and conditions of the Creative Commons Attribution (CC BY) license (<http://creativecommons.org/licenses/by/4.0/>).
